# Supplementary material for: Selection of aptamers based on a protein microarray integrated with a microfluidic chip
Source: Royal Society of Chemistry journal article supplement (doi:10.1039/c6lc01208f), 2016-11-17
Supplement: c6lc01208f1.pdf [file c6lc01208f1.pdf]

## Selection of Aptamers Based on Protein Microarray Integrated with Microfluidic Chip

Xiaohui Liu, Hui Li\*, Wenchao Jia, Zhu Chen, Danke Xu\*

*†State Key Laboratory of Analytical Chemistry for Life Science, School of Chemistry and  
Chemical Engineering, Nanjing University, China*

### **Corresponding Author**

Tel/Fax (+) 00862589685835

E-mail: [xudanke@nju.edu.cn](mailto:xudanke@nju.edu.cn)

E-mail: [lihui@nju.edu.cn](mailto:lihui@nju.edu.cn)

Table S1

|          | Round 1   | Round 2    | Round 3    | Round 4    | Round 5    | Round 6    | Round 7    | Round 8    |
|----------|-----------|------------|------------|------------|------------|------------|------------|------------|
| Circle-1 | 1000 pmol | 48.60 pmol | 53.13 pmol | 43.86 pmol | 52.19 pmol | 59.51 pmol | 53.85 pmol | -          |
| Circle-2 | 1000 pmol | 87.83 pmol | 88.38 pmol | 96.48 pmol | 89.34 pmol | 94.13 pmol | 92.27 pmol | 88.75 pmol |
| Circle-3 | 1000 pmol | 69.92 pmol | 76.76 pmol | 71.10 pmol | 64.02 pmol | 66.77 pmol | 71.37 pmol | 58.40 pmol |

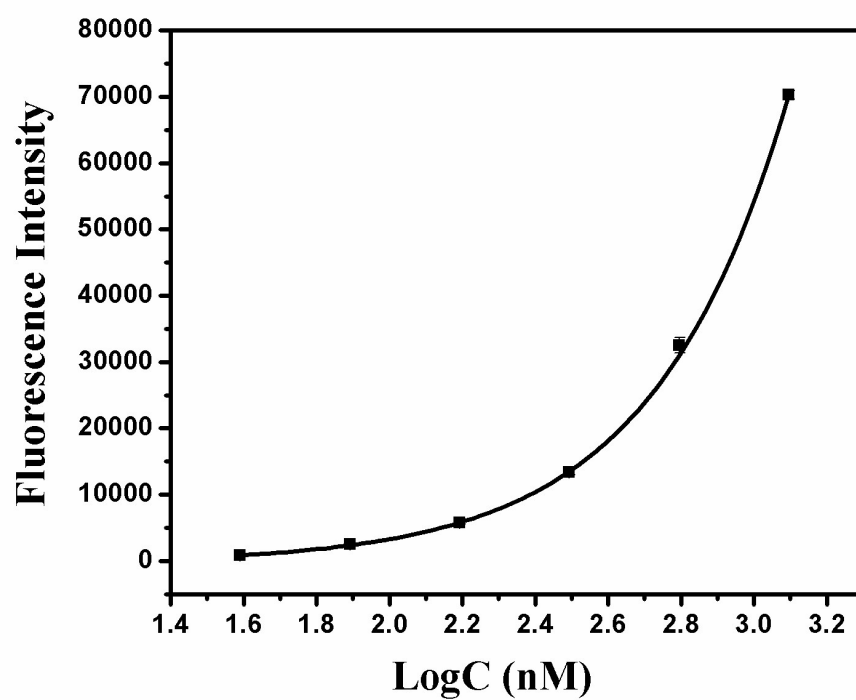

Figure S1. The fluorescence intensity of lib with different concentration.

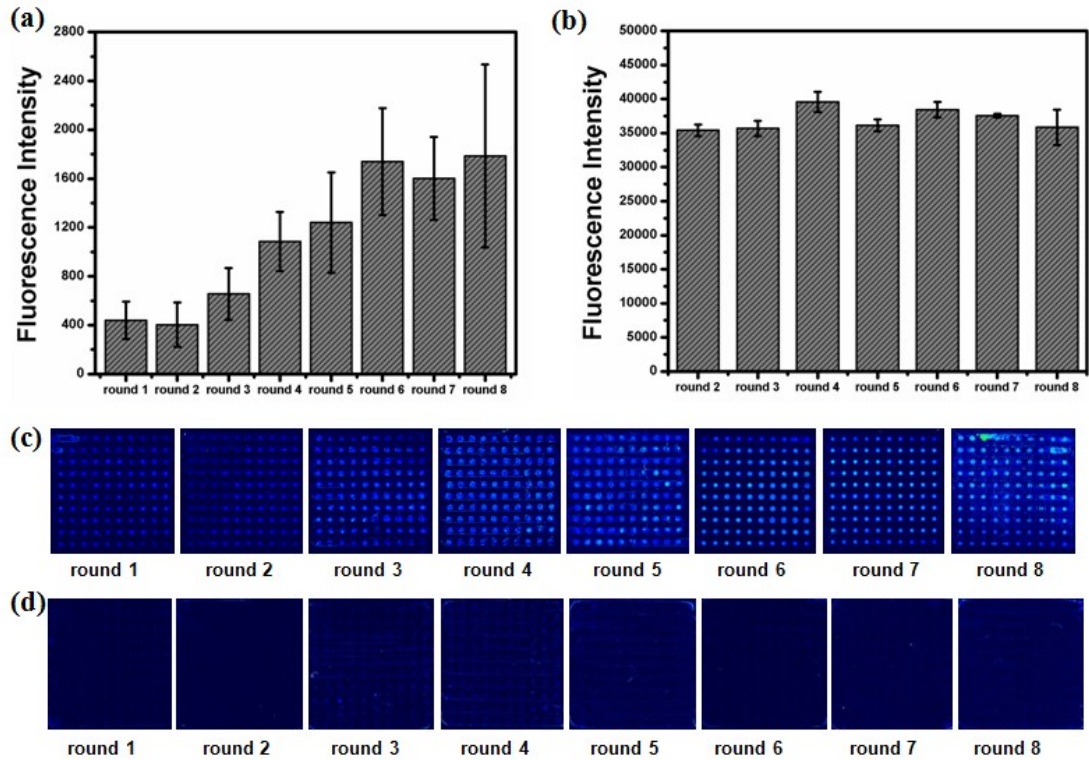

Figure S2. (a)The fluorescence intensity of evolved ssDNA pool in every round of selection. (b)The fluorescence intensity of enriched aptamers on target microarrays in every round of selection.(c) The fluorescence images of enriched aptamers on target microarrays in every round of selection before (d) and after elution (e).

Table S2 The selected sequences in the second time of PMM-SELEX.

| Aptamer-ID | Sequences of N40 from 5' to 3'            | Repeated times  |                 |                   | Total times |
|------------|-------------------------------------------|-----------------|-----------------|-------------------|-------------|
|            |                                           | The fifth round | The sixth round | The seventh round |             |
| Lac-14     | CCTAACACGTACGGGGCATTATGGCATAGCTCTTCCTCC   | 18              | 16              | 8                 | 42          |
| Lac-6a     | CGGTGCATCTATGGCTACTAGCTTTCTCTGCCTATACTAC  | 7               | 9               | 7                 | 23          |
| Lac-9      | GGGCAATCTTGCTCTTATTTTACACATTGATAAATATGTC  | 1               | 2               | 1                 | 4           |
| Lac-5      | GGGCTTATGCTCTTAAAAATCCTGAGCGACTTTTATGTA   | 2               | 0               | 2                 | 4           |
| Lac-3a     | AATACTCCTGTTACCGTGCATCTATGGCCATTGGCTTTTC  | 1               | 1               | 1                 | 3           |
| Lac-6b     | TCGGGCAAAGCTCTGAATAATGTCCAACCAATATCTGTGC  | 0               | 1               | 3                 | 4           |
| Lac-A1     | ACGGGCTGATGCTCTTTATTTTACCTAAATAAAGTGTC    | 2               | 4               | 3                 | 9           |
| Lac-A2     | ATTTGAGCAGACGGGAGACTTTTAGAGTTGTAACCTTGAGT | 2               | 2               | 8                 | 12          |
| Lac-A3     | CGGGCATTTGCTCTCAATTTAGTCTCAAATTGGCCCTGC   | 0               | 6               | 1                 | 7           |
| Lac-A4     | CGGTGCATCTATGGCTACTAGCTCTTCTGCCTATACTAC   | 2               | 4               | 7                 | 13          |
| Lac-A5     | GGGCTATGCTCTAAATTCTTCTACTGACGCAATTTTGGA   | 7               | 3               | 1                 | 11          |
| Lac-A6     | GGGTGCACACTTATTTTACACGAGCCAAAAATATGTC     | 2               | 1               | 2                 | 5           |
| Lac-A7     | TCATCCCAAGCTCCGGTGCATCTATGGGCTTCGCTTTTC   | 1               | 2               | 3                 | 6           |
| Lac-A8     | CCCTAGTTCCTGGTGCAATTTATGGCAAAGCTTTCTTGCC  | 4               | 2               | 1                 | 7           |
| Lac-A9     | ACCGGTGCGTCCCACGGCTCCAGCTCTTCTGCCTATTTTC  | 3               | 0               | 0                 | 3           |
| Lac-A10    | ACTGCTTTATCCCCGTCGGCTTGCTCTTCGACAGTGTGG   | 12              | 27              | 13                | 52          |
| Lac-A11    | GGGCGAACGCTCTTTATTTTGGAAACCCACAAAATAATGTT | 1               | 0               | 4                 | 5           |
| Lac-A12    | GGGCGGAGCTCTTCCATTTCAGATTGTAAATGGATGTCA   | 0               | 2               | 2                 | 4           |
| Lac-A13    | GGTGCAATTATTGGTGAACACTCTTCCTTAGCCTGCTACT  | 2               | 2               | 3                 | 7           |
| Lac-A14    | TGAACGGTCTTGGCTACTGCACATTTTCTCTGCCTTTGTT  | 1               | 6               | 1                 | 8           |

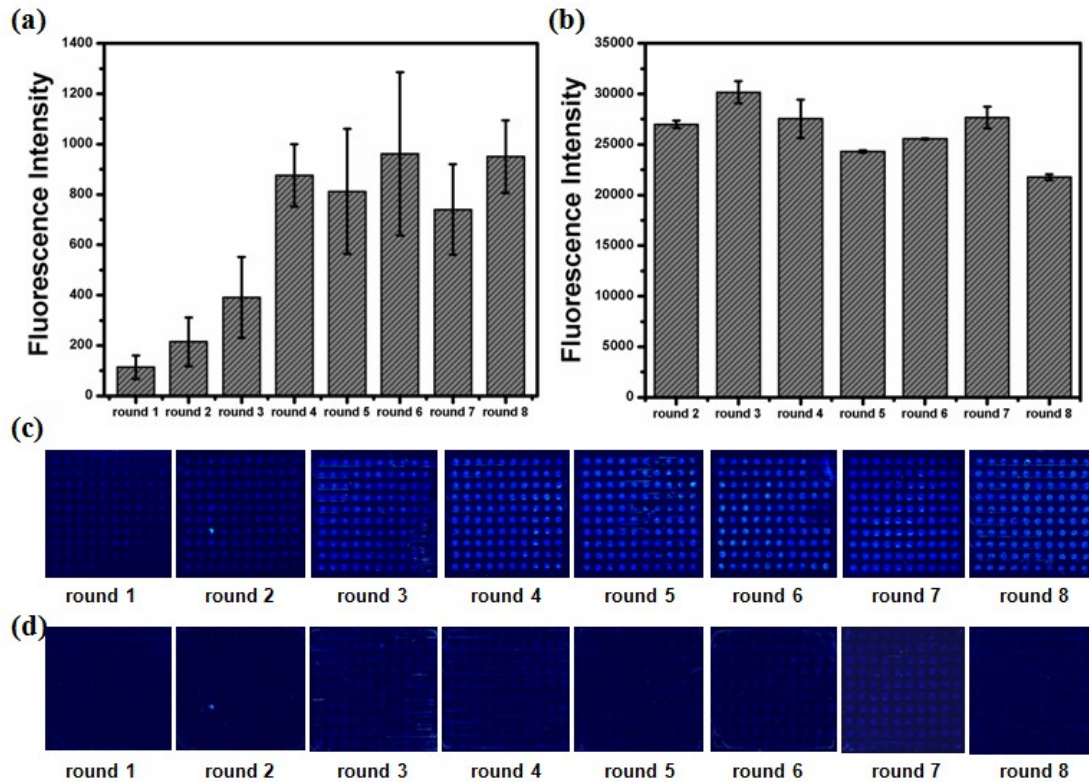

Figure S3. (a)The fluorescence intensity of evolved ssDNA pool in every round of selection.(b)The fluorescence intensity of enriched aptamers on target microarrays in every round of selection.(c) The fluorescence images of enriched aptamers on target microarrays in every round of selection before (d) and after elution (e).

Table S3 The selected sequences in the third time of PMM-SELEX.

| Aptamer-ID | Sequences of N40 from 5' to 3'            | Repeated times  |                 |                   | Total times |
|------------|-------------------------------------------|-----------------|-----------------|-------------------|-------------|
|            |                                           | The fifth round | The sixth round | The seventh round |             |
| Lac-14     | CCTAACACGTACGGGGCATTTATGGCATAGCTTTCCTCC   | 12              | 5               | 8                 | 25          |
| Lac-6a     | CGGTGCATCTATGGCTACTAGCTTTCTGCTATACTAC     | 4               | 2               | 4                 | 10          |
| Lac-9      | GGGCAATCTTGCTCTTATTTTACACATTGATAAATATGTC  | 0               | 2               | 0                 | 2           |
| Lac-5      | GGGCTTATGCTCTTAAAAATCCTGAGCGACTTTTATGTA   | 2               | 0               | 0                 | 2           |
| Lac-3a     | AATACTCCTGTTACCGTGCATCTATGGCATTGGCTTTTC   | 2               | 2               | 0                 | 4           |
| Lac-A1     | ACGGGCTGATGCTCTTTATTTTACCTAAATAAAGTGTC    | 8               | 10              | 5                 | 23          |
| Lac-A2     | ATTTGAGCAGACGGGAGACTTTTAGAGTTGTAACCTGAGT  | 2               | 1               | 0                 | 3           |
| Lac-A3     | CGGGCATTGCTCTCAATTTAGTCTCAAATTTGGCCCTGC   | 2               | 5               | 4                 | 11          |
| Lac-A4     | CGGTGCATCTATGGCTACTAGCTTCTGCTATACTAC      | 8               | 7               | 12                | 27          |
| Lac-A5     | GGGCTATGCTCTAAATTCTTCTACTGACGCAATTTTGA    | 8               | 5               | 2                 | 15          |
| Lac-A6     | GGGTGCACACTCTTATTTTACACGAGCAAAAAATATGTC   | 7               | 1               | 4                 | 12          |
| Lac-A7     | TCATCCCAAGCTCCGGTGCCATCTATGGGCTTCGCTTTTC  | 3               | 3               | 4                 | 10          |
| Lac-A8     | CCCTAGTTCCTGGTGCATTTATGGCAAAGCTTTCTCTGCC  | 3               | 2               | 2                 | 7           |
| Lac-B1     | AACAACCTTCGTATCCGGTGCATTTATGGCGAATGCTTTTC | 0               | 0               | 3                 | 3           |
| Lac-B2     | ACTACCTCTTTTCGGTGCGATCCATTTCGGCTTTGCTTTTC | 2               | 16              | 5                 | 23          |
| Lac-B3     | ACTGCTTTATCCCGTCCGGCTTGGCTCTTCGACAGTGTTG  | 1               | 1               | 1                 | 3           |
| Lac-B4     | ACTGCTTTATCCCGTCCGGCTTGTCTCTTCGACAGTGTTG  | 0               | 2               | 1                 | 3           |
| Lac-B5     | ATTTGAGCAGACGGGAGACCTTTAGAGTTGTAACCTGAGT  | 7               | 7               | 5                 | 19          |
| Lac-B6     | CAGTATAGGTGCATTTTGGCGCAAGCTTCTCTGCCCTG    | 2               | 0               | 2                 | 4           |
| Lac-B7     | CATCGACGGTGCCGGTCTCGGGCATTTTGCTCTTCTGCC   | 5               | 1               | 0                 | 6           |
| Lac-B8     | CCCACTCGAGGTGCAATTTTGGCGTGAGCTCTTCTGCCG   | 0               | 1               | 3                 | 4           |
| Lac-B9     | CCCTAGTTCCTGGTGCATCTATGGCAAAGCTTCTCTGCC   | 1               | 2               | 0                 | 3           |
| Lac-B10    | CCCTAGTTCCTGGTGCATTTATGGCAAAGCTTCTCTGCC   | 1               | 3               | 0                 | 4           |
| Lac-B11    | CTACAACGGTGCCATCTATGGGCTTTGCTTTTCTGCTC    | 4               | 2               | 2                 | 8           |
| Lac-B12    | GGTGCATCCATGGCTTTTAGCTCTTCTGAACTGTCACAC   | 2               | 4               | 7                 | 13          |
| Lac-B13    | GGTGCATCTATGGCTTTGCTCTTCTACCTGTTCTACGAG   | 0               | 3               | 5                 | 8           |
| Lac-B14    | GGTGGGTGTACACGGCTCTGCTTTTCTGCTCTGTTCAC    | 6               | 1               | 5                 | 12          |

Table S4 The association time ( $K_{on}$ ), dissociation time ( $K_{off}$ ) and dissociation constant ( $K_d$ ) of selected aptamers.

| Aptamer-ID | $K_{on} (M^{-1}s^{-1})(\times 10^6)$ | $K_{off} (s^{-1})(\times 10^{-2})$ | $K_d$ (nM)      |
|------------|--------------------------------------|------------------------------------|-----------------|
| Lac-14     | $2.01 \pm 0.39$                      | $1.06 \pm 0.15$                    | $5.48 \pm 1.79$ |
| Lac-6a     | $11.66 \pm 5.19$                     | $1.04 \pm 0.11$                    | $1.04 \pm 0.50$ |
| Lac-9      | $3.42 \pm 0.98$                      | $3.43 \pm 0.02$                    | $1.07 \pm 0.34$ |
| Lac-5      | $1.20 \pm 0.03$                      | $0.11 \pm 0.00$                    | $0.92 \pm 0.02$ |
| Lac-3a     | $4.60 \pm 0.88$                      | $0.29 \pm 0.04$                    | $0.63 \pm 0.06$ |

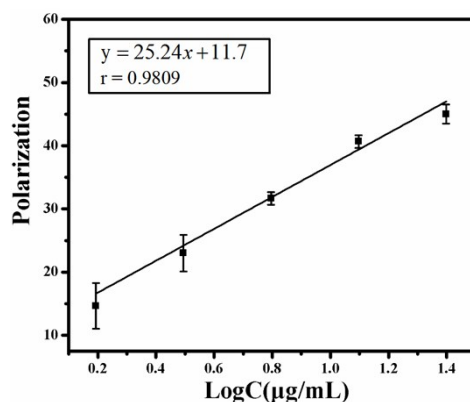

Figure S4. The polarization of Lac-6a-FITC at different five different concentrations (25  $\mu\text{g/mL}$ , 12.5  $\mu\text{g/mL}$ , 6.25  $\mu\text{g/mL}$ , 3.12  $\mu\text{g/mL}$ , 1.56  $\mu\text{g/mL}$  of Lactoferrin in Meadjohnson Enfamil (100-fold diluted) sample.  $\mu\text{g/mL}$ , 6.25  $\mu\text{g/mL}$ , 3.12  $\mu\text{g/mL}$ , 1.56  $\mu\text{g/mL}$  of Lactoferrin in Meadjohnson Enfamil (100-fold diluted) sample.

Table S5 Analytical recovery of infant formula (Meadjohnson Enfinitas, 100-fold diluted, 4.5  $\text{mg/mL}$  Lactoferrin) sample with with fluorescence polarization method.

| Concentration [ $\mu\text{g/mL}$ ] | Recovery in infant formula |
|------------------------------------|----------------------------|
|                                    | [%]                        |
| 4.5                                | 111                        |

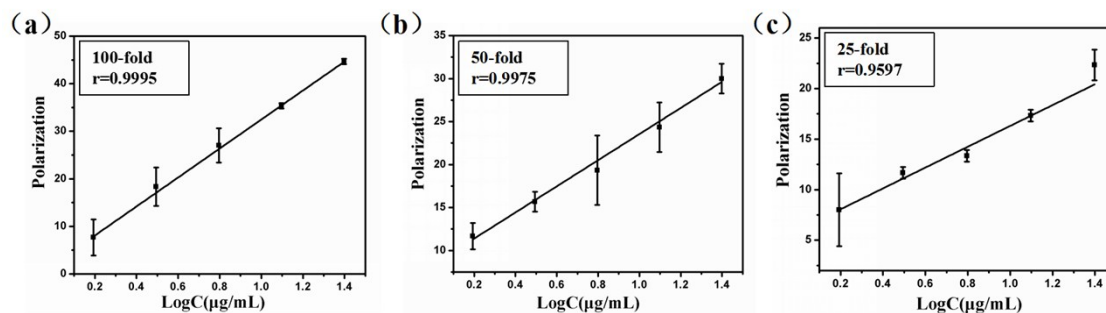

Figure S5. The linear correlation between polarization signal and Lactoferrin concentrations in the range of 1.56 - 25  $\mu\text{g/mL}$  in (a) 100-fold, (b) 50-fold, (c) 25-fold diluted mike (Telunsu) samples.
